# Supplementary material
Source: MDPI journal article supplement (https://www.mdpi.com/1424-2818/13/12/676)
Supplement: s1 [file s1]

## SUPPORTING MATERIAL

**Table S1.** Name, acronym and geographic coordinates of the sampling sites. Locations 1 to 5 were collected in this study. Geographic information of the locations 6 and 8 were obtained from [6].

| Location                         | Location code | State           | Collecting date | Latitude N | Longitude W | Elevation (masl) |
|----------------------------------|---------------|-----------------|-----------------|------------|-------------|------------------|
| 1. Cuitzeo lagoon, limnetic      | CUI           | Michoacán       | 25/02/2014      | 19.8894    | -100.9439   | 1836             |
| 2. Santa Teresa dam, littoral    | STE           | Michoacán       | 17/08/2014      | 19.8886    | -100.1722   | 2307             |
| 3. Yuriria dam, littoral         | YUR           | Guanajuato      | 27/09/2014      | 20.2211    | -101.1361   | 1736             |
| 4. Tepatitlan-Yahualica pond     | TYA           | Jalisco         | 22/08/2015      | 21.0850    | -102.8694   | 1780             |
| 5. Huapango dam, littoral        | HUA           | State of Mexico | 17/08/2014      | 19.9483    | -99.7144    | 2619             |
| 6. Ignacio Ramirez dam, limnetic | IGR           | State of Mexico | 22/06/2011      | 19.46      | -99.777     |                  |
| 7. Timilpan pond                 | TIM           | State of Mexico | 22/06/2011      | 19.887     | -99.739     |                  |
| 8. Aguada Kohunlich              | KOH           | Quintana Roo    | 03/02/2011      | 18.447     | -88.825     |                  |

**Table S2.** PCR reaction mix and cycle profile for ITS1 nuclear marker.

| PCR reagents                                             | PCR profile                         |
|----------------------------------------------------------|-------------------------------------|
| <b>Volumes for one reaction (13.5 <math>\mu</math>L)</b> | Initial step: 95°C for 5 min        |
| DNA template 3 $\mu$ L                                   | 36 cycles of the following profile: |
| Trehalose 10% 6.25 $\mu$ L                               |                                     |
| ddH <sub>2</sub> O 2 $\mu$ L                             |                                     |
| 10X PCR buffer 1.25 $\mu$ L                              |                                     |
| 50 mM MgCl <sub>2</sub> 0.625 $\mu$ L                    |                                     |
| 0.01 mM Primer 1 0.125 $\mu$ L                           | Denaturing step: 95°C for 50 s      |
| 0.01 mM Primer 2 0.125 $\mu$ L                           | Annealing step: 54°C for 50 s       |
| 0.05 mM dNTP mix 0.0625 $\mu$ L                          | Extending step: 72°C for 1 min      |
| Taq polymerase 0.06 $\mu$ L                              | Final step: 72°C for 5 min          |

**Table S4.** Percentages of uncorrected genetic distances of COI gene. On diagonal are the genetic distances within the ESUs under study, and below the diagonal are the genetic distances among the ESUs discriminated by the species delineation methods.

|      | ESU1 | ESU2 | ESU3 | ESU4 | ESU5 | ESU6 |
|------|------|------|------|------|------|------|
| ESU1 | 0    |      |      |      |      |      |
| ESU2 | 4.4  | 0.2  |      |      |      |      |
| ESU3 | 15.7 | 17.2 | 0.5  |      |      |      |
| ESU4 | 14.9 | 15.6 | 13.1 | 0.1  |      |      |
| ESU5 | 15.6 | 15.8 | 14.3 | 11.9 | 0.5  |      |
| ESU6 | 19.2 | 20.1 | 17.5 | 17.2 | 17.7 | 0.8  |

**Table S5.** Percentages of uncorrected genetic distances of ITS1 marker. On diagonal are the genetic distances within the ESUs under study, and below the diagonal are the genetic distances among the ESUs discriminated by the species delineation methods.

|        | ESUI | ESUII | ESUIII | ESUIV |
|--------|------|-------|--------|-------|
| ESUI   | 0    |       |        |       |
| ESUII  | 9.0  | 0.5   |        |       |
| ESUIII | 5.8  | 9.4   | 0.1    |       |
| ESUIV  | 3.8  | 10.8  | 5.8    | 0     |

**Table S6.** Measurements of *Keratella* specimens from Mexico. Measurements are in microns. TL = Total length, LL = Lorica length, LW= Lorica width, RPS= Right posterior spine, LPS= Left posterior spine, AMS= Anteromedian spine, AIS= Antero intermediate spine, ALS= Antero lateral spine.

| CUITZEO |    | TL  | LL  | LW | RPS | LPS | AMS | AIS | ALS |
|---------|----|-----|-----|----|-----|-----|-----|-----|-----|
|         | 1  | 306 | 130 | 80 | 148 | 44  | 26  | 18  | 16  |
|         | 2  | 284 | 130 | 76 | 128 | 44  | 26  | 18  | 16  |
|         | 3  | 274 | 128 | 76 | 120 | 42  | 25  | 17  | 15  |
|         | 4  | 270 | 124 | 76 | 120 | 44  | 26  | 18  | 16  |
|         | 5  | 304 | 132 | 76 | 146 | 50  | 26  | 18  | 16  |
|         | 6  | 314 | 136 | 74 | 152 | 56  | 26  | 18  | 16  |
|         | 7  | 304 | 134 | 74 | 144 | 54  | 26  | 18  | 16  |
|         | 8  | 260 | 134 | 74 | 100 | 62  | 26  | 18  | 16  |
|         | 9  | 304 | 132 | 76 | 146 | 54  | 26  | 18  | 16  |
|         | 10 | 298 | 126 | 74 | 146 | 44  | 26  | 18  | 16  |

|    |     |     |    |     |    |    |    |    |
|----|-----|-----|----|-----|----|----|----|----|
| 11 | 275 | 130 | 75 | 118 | 45 | 27 | 18 | 15 |
| 12 | 306 | 137 | 76 | 142 | 52 | 27 | 18 | 15 |
| 13 | 306 | 137 | 75 | 142 | 55 | 27 | 18 | 16 |
| 14 | 301 | 135 | 75 | 140 | 50 | 26 | 18 | 16 |
| 15 | 296 | 140 | 75 | 130 | 50 | 26 | 18 | 16 |

| SANTA TERESA | TL  | LL  | LW | RPS | LPS | AMS | AIS | ALS |
|--------------|-----|-----|----|-----|-----|-----|-----|-----|
| 1            | 266 | 126 | 80 | 106 | 58  | 34  | 21  | 19  |
| 2            | 260 | 128 | 80 | 96  | 68  | 36  | 22  | 20  |
| 3            | 264 | 128 | 80 | 100 | 70  | 36  | 22  | 20  |
| 4            | 264 | 128 | 80 | 100 | 58  | 34  | 21  | 19  |
| 5            | 270 | 130 | 82 | 104 | 48  | 36  | 22  | 20  |
| 6            | 274 | 132 | 82 | 106 | 70  | 36  | 22  | 20  |
| 7            | 264 | 128 | 74 | 100 | 68  | 36  | 22  | 20  |
| 8            | 264 | 126 | 80 | 102 | 56  | 36  | 22  | 20  |
| 9            | 264 | 128 | 84 | 100 | 68  | 36  | 22  | 20  |
| 10           | 266 | 130 | 84 | 100 | 66  | 36  | 22  | 20  |

| HUAPANGO | TL  | LL  | LW | RPS | LPS | AMS | AIS | ALS |
|----------|-----|-----|----|-----|-----|-----|-----|-----|
| 1        | 194 | 108 | 64 | 54  | 40  | 30  | 19  | 17  |
| 2        | 200 | 112 | 68 | 56  | 48  | 32  | 20  | 18  |
| 3        | 204 | 116 | 68 | 56  | 44  | 32  | 20  | 18  |
| 4        | 202 | 114 | 64 | 56  | 44  | 32  | 20  | 18  |
| 5        | 200 | 114 | 68 | 54  | 44  | 32  | 20  | 18  |
| 6        | 194 | 110 | 66 | 52  | 40  | 30  | 19  | 17  |
| 7        | 204 | 114 | 68 | 58  | 46  | 32  | 20  | 18  |
| 8        | 202 | 112 | 66 | 58  | 50  | 32  | 20  | 18  |
| 9        | 208 | 116 | 72 | 60  | 58  | 32  | 20  | 18  |
| 10       | 204 | 116 | 66 | 56  | 44  | 32  | 20  | 18  |
| 11       | 197 | 110 | 65 | 55  | 40  | 32  | 19  | 17  |
| 12       | 205 | 117 | 63 | 57  | 47  | 32  | 20  | 18  |
| 13       | 202 | 112 | 64 | 58  | 50  | 32  | 19  | 17  |
| 14       | 205 | 117 | 64 | 57  | 49  | 33  | 20  | 18  |
| 15       | 199 | 112 | 63 | 55  | 45  | 32  | 19  | 17  |

| YURIRIA | TL  | LL  | LW | RPS | LPS | AMS | AIS | ALS |
|---------|-----|-----|----|-----|-----|-----|-----|-----|
| 1       | 248 | 118 | 68 | 100 | 30  | 28  | 19  | 18  |
| 2       | 246 | 116 | 66 | 100 | 50  | 30  | 20  | 20  |
| 3       | 254 | 120 | 70 | 100 | 48  | 34  | 22  | 20  |
| 4       | 242 | 118 | 70 | 90  | 44  | 34  | 24  | 20  |
| 5       | 248 | 114 | 68 | 100 | 46  | 34  | 22  | 20  |
| 6       | 230 | 110 | 70 | 90  | 38  | 30  | 20  | 20  |
| 7       | 210 | 100 | 70 | 80  | 30  | 28  | 19  | 18  |
| 8       | 242 | 114 | 68 | 98  | 40  | 30  | 20  | 18  |
| 9       | 264 | 110 | 70 | 118 | 48  | 36  | 24  | 20  |

|    |     |     |    |    |    |    |    |    |
|----|-----|-----|----|----|----|----|----|----|
| 10 | 250 | 118 | 70 | 98 | 46 | 34 | 22 | 20 |
|----|-----|-----|----|----|----|----|----|----|

| TEPATITLAN-YAHUALILCA | TL  | LL | LW | RPS | LPS | AMS | AIS | ALS |
|-----------------------|-----|----|----|-----|-----|-----|-----|-----|
| 1                     | 196 | 92 | 48 | 80  | 28  | 24  | 20  | 20  |
| 2                     | 184 | 90 | 50 | 72  | 14  | 22  | 20  | 20  |
| 3                     | 200 | 98 | 60 | 78  | 26  | 24  | 22  | 20  |
| 4                     | 202 | 98 | 56 | 80  | 26  | 24  | 20  | 20  |
| 5                     | 194 | 94 | 56 | 76  | 24  | 24  | 20  | 20  |
| 6                     | 188 | 94 | 56 | 70  | 8   | 24  | 20  | 20  |
| 7                     | 180 | 90 | 50 | 66  | 22  | 24  | 20  | 20  |
| 8                     | 168 | 92 | 54 | 54  | 34  | 22  | 18  | 18  |
| 9                     | 196 | 96 | 54 | 80  | 20  | 20  | 18  | 18  |
| 10                    | 174 | 90 | 54 | 64  | 16  | 20  | 18  | 18  |

| IGNACIO RAMIREZ | TL  | LL  | LW | RPS | LPS | AMS | AIS | ALS |
|-----------------|-----|-----|----|-----|-----|-----|-----|-----|
| 1               | 314 | 152 | 87 | 137 | 57  | 25  | 25  | 17  |
| 2               | 332 | 150 | 87 | 147 | 50  | 35  | 30  | 25  |
| 3               | 324 | 152 | 85 | 135 | 57  | 37  | 25  | 20  |
| 4               | 304 | 147 | 87 | 125 | 55  | 32  | 25  | 17  |
| 5               | 316 | 147 | 87 | 132 | 50  | 37  | 25  | 22  |
| 6               | 314 | 152 | 87 | 130 | 57  | 32  | 25  | 20  |
| 7               | 309 | 142 | 85 | 137 | 40  | 30  | 25  | 20  |
| 8               | 317 | 150 | 77 | 132 | 45  | 35  | 27  | 22  |
| 9               | 322 | 157 | 85 | 130 | 57  | 35  | 27  | 22  |
| 10              | 309 | 152 | 87 | 125 | 52  | 32  | 27  | 20  |
| 11              | 297 | 145 | 82 | 120 | 30  | 32  | 25  | 20  |
| 12              | 297 | 150 | 82 | 115 | 42  | 32  | 25  | 20  |

| KOHUNLICH | TL  | LL  | LW | RPS | LPS | AMS | AIS | ALS |
|-----------|-----|-----|----|-----|-----|-----|-----|-----|
| 1         | 275 | 125 | 77 | 105 | 62  | 45  | 25  | 22  |
| 2         | 259 | 112 | 75 | 102 | 57  | 45  | 22  | 20  |
| 3         | 264 | 112 | 75 | 107 | 57  | 45  | 22  | 20  |
| 4         | 271 | 112 | 75 | 112 | 65  | 47  | 25  | 22  |
| 5         | 259 | 107 | 75 | 107 | 57  | 45  | 20  | 17  |
| 6         | 254 | 107 | 75 | 105 | 62  | 42  | 22  | 20  |
| 7         | 271 | 107 | 75 | 122 | 55  | 42  | 22  | 20  |
| 8         | 240 | 105 | 67 | 95  | 52  | 40  | 22  | 20  |
| 9         | 247 | 105 | 72 | 102 | 57  | 40  | 22  | 20  |
| 10        | 252 | 107 | 75 | 100 | 55  | 45  | 25  | 22  |
| 11        | 259 | 112 | 77 | 105 | 62  | 42  | 22  | 20  |
| 12        | 242 | 105 | 75 | 95  | 57  | 42  | 22  | 20  |
